# Supplementary material for: Direct synthesis of p-methyl benzaldehyde from acetaldehyde via an organic amine-catalyzed dehydrogenation mechanism
Source: PubMed Central journal article supplement — iScience. 2021 Aug 23;24(9):103028. doi: 10.1016/j.isci.2021.103028 (PMC8426279; doi:10.1016/j.isci.2021.103028), 2021-08-23
Supplement: mmc1.pdf [file mmc1.pdf]

iScience, Volume 24

## Supplemental information

**Direct synthesis of *p*-methyl benzaldehyde from  
acetaldehyde via an organic amine-catalyzed  
dehydrogenation mechanism**

**Qing-Nan Wang, Xianghui Liu, Kai Wang, Yan Liu, Sheng-Mei Lu, and Can Li**

**Figure S1.** IR Spectra and *in situ* cell, related to Figure 2.

(A and B) CH<sub>3</sub>CHO-IR spectra with THP-DPh-OTMS and THP as catalysts (conditions: 45 μmol CH<sub>3</sub>CHO,  $n_{\text{CH}_3\text{CHO}}/n_{\text{THP-Ph-DOTMS}}/n_{\text{p-NO}_2\text{-Ph-OH}} = 45:0.5:1.2$ , at 20 °C).

(C) IR difference spectra using THP as catalysts.

(D) Standard IR spectra of reactants, products, and catalysts.

(E) The liquid reaction cell used.

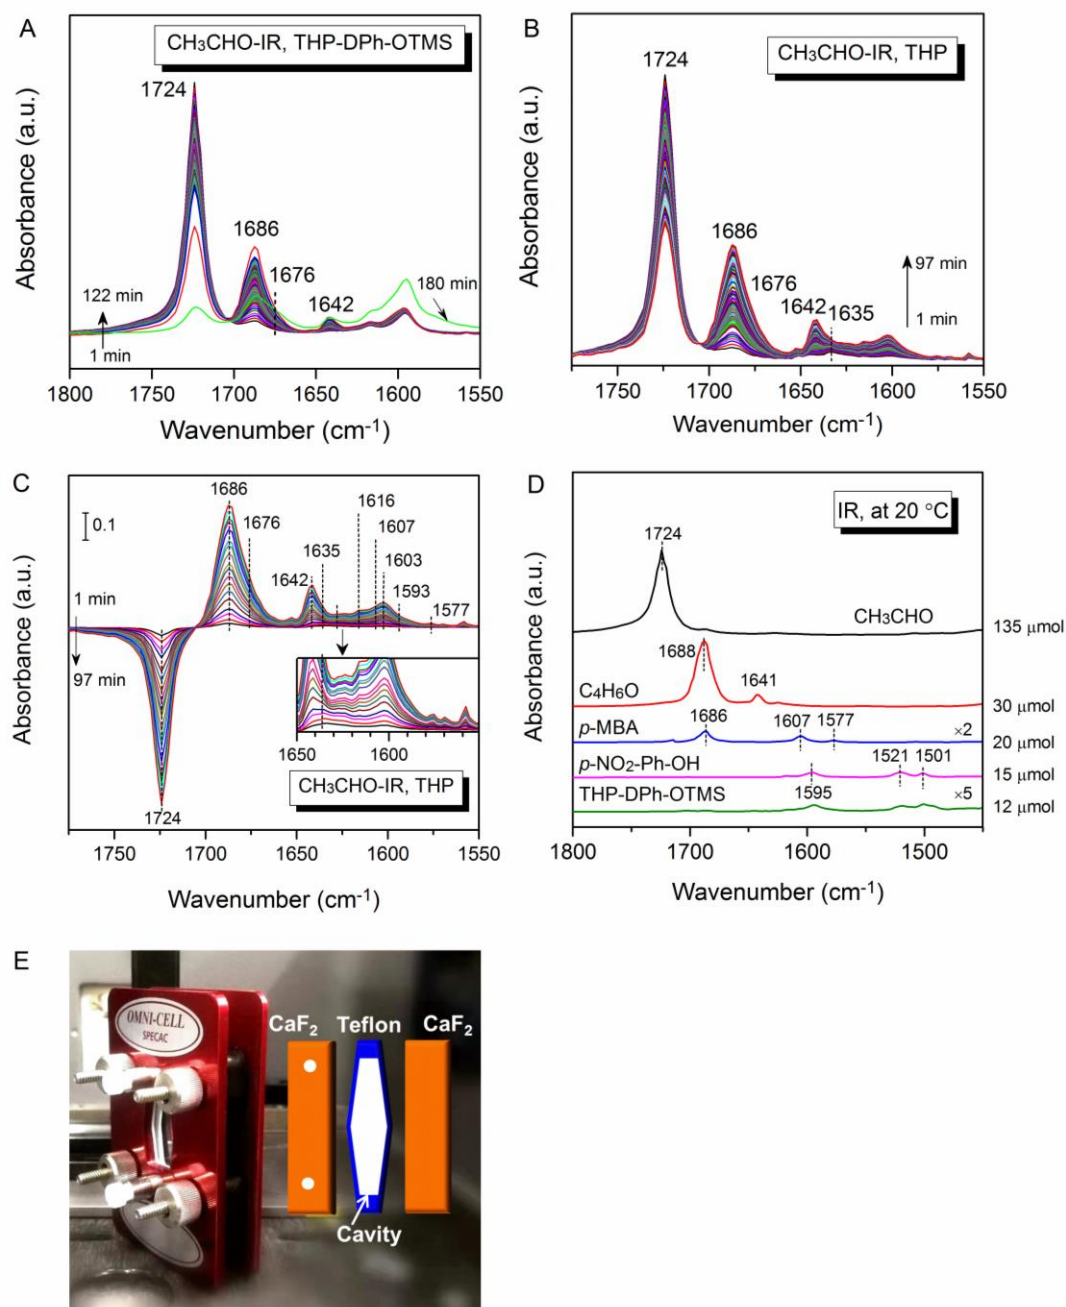

Figure S2. (A) H-NMR and (B)  $^{13}\text{C}$ -NMR spectra of *p*-MBA, related to the STAR Methods.

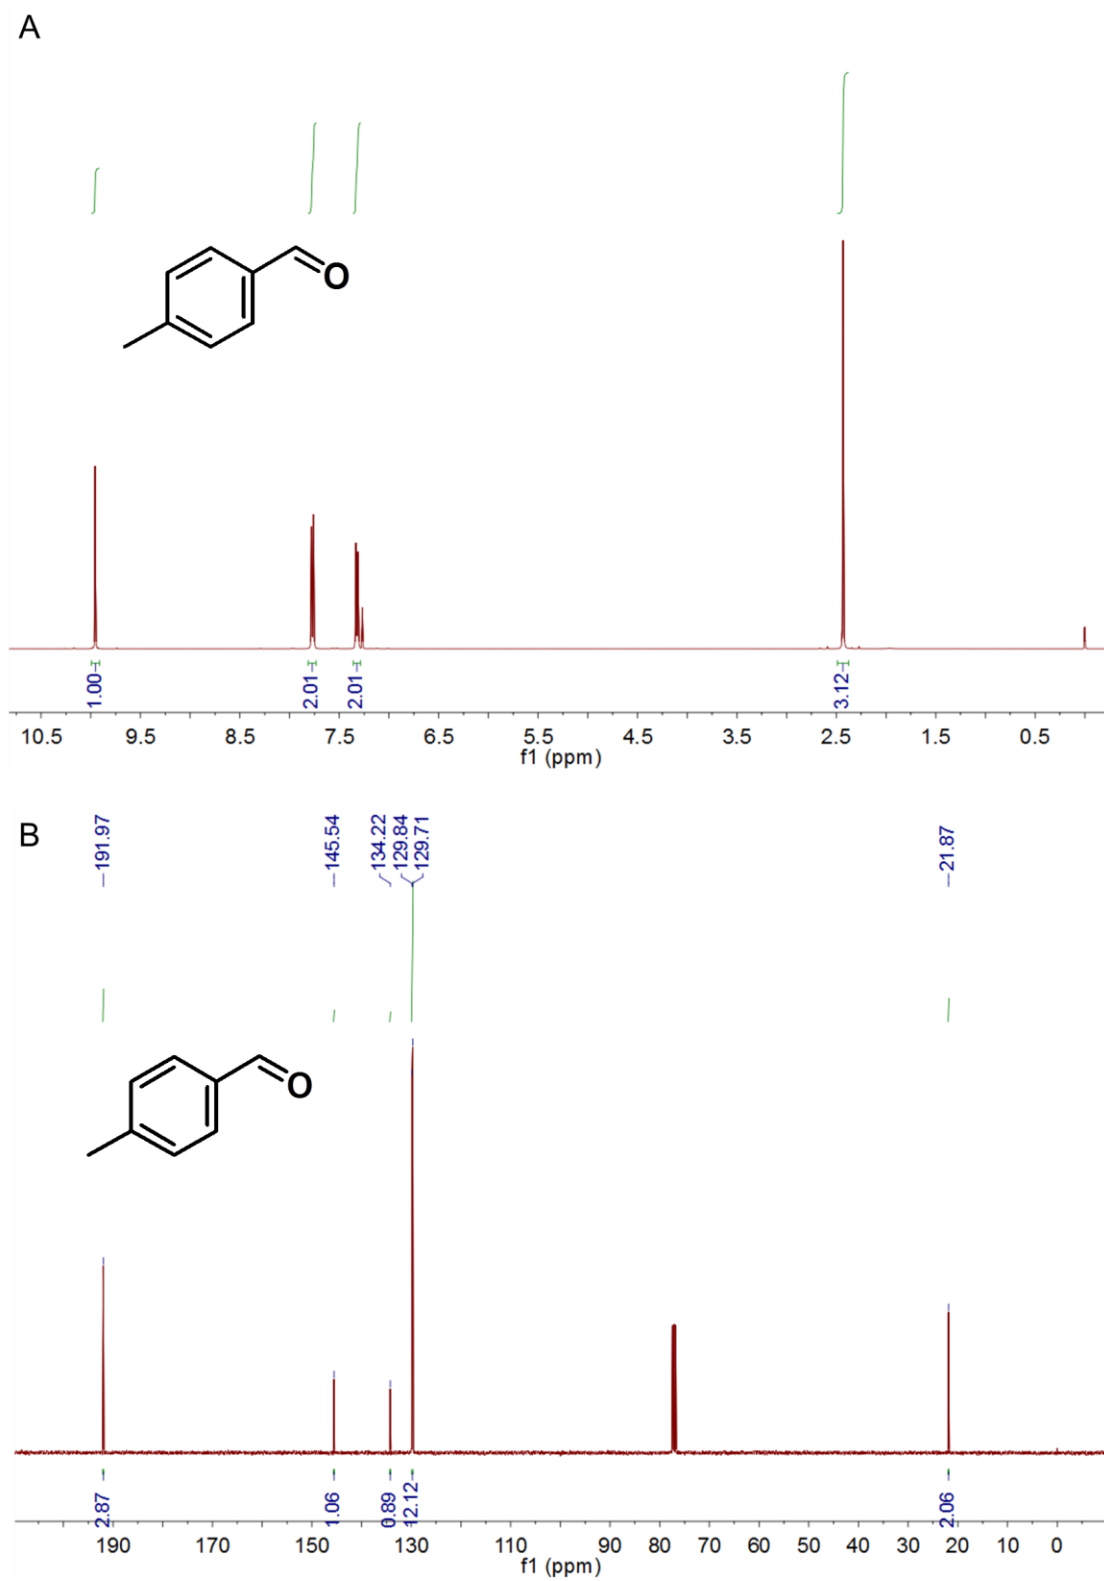

**Figure S3.** A H-NMR spectrum of THP-DPh-OTMS, related to the STAR Methods.

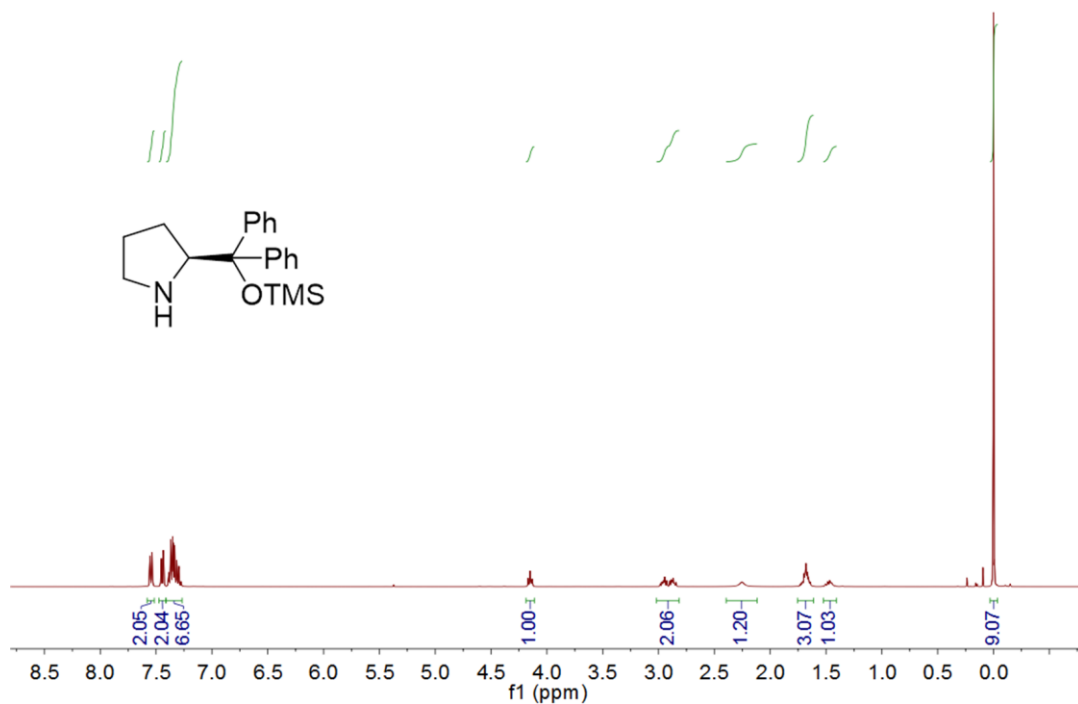

**Figure S4.** *In situ* H-NMR spectra using CH<sub>3</sub>CHO as reactants at 20 °C, related to the STAR Methods (condition: 400 μmol CH<sub>3</sub>CHO, 22 μmol THP-DPh-OTMS, and 45 μmol *p*-NO<sub>2</sub>-Ph-OH in CDCl<sub>3</sub>).

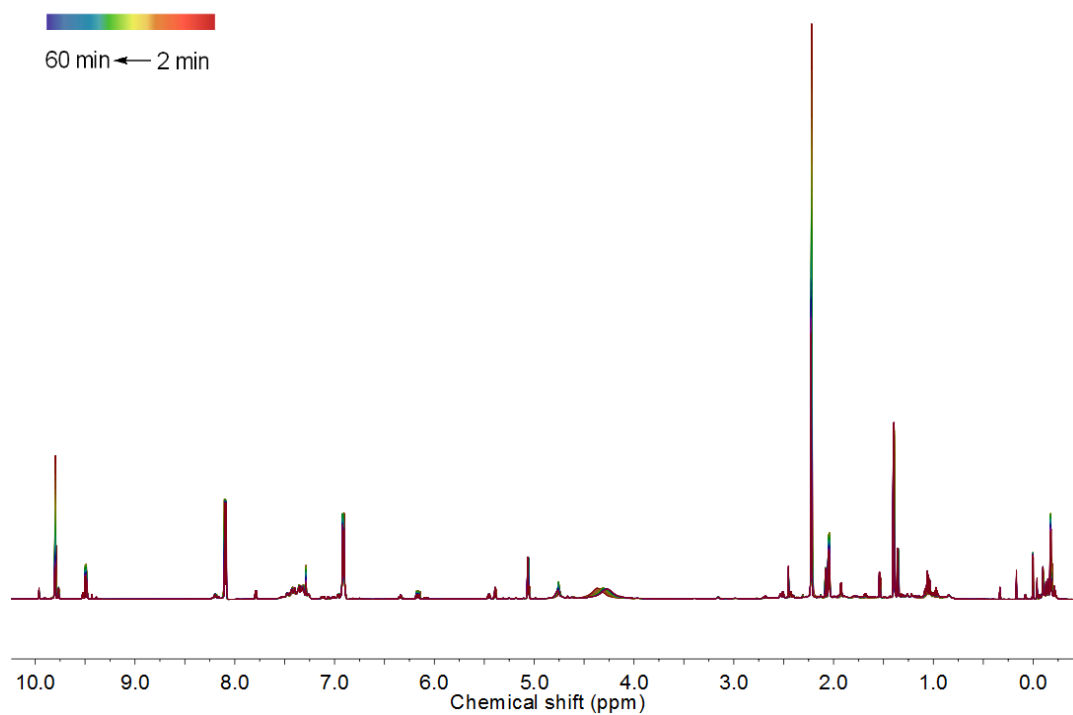

**Figure S5.** (A and B) Detailed *In situ* H-NMR spectra obtained from Figure S4, related to the STAR Methods. Panels inserted in A and B were the enlarged details.

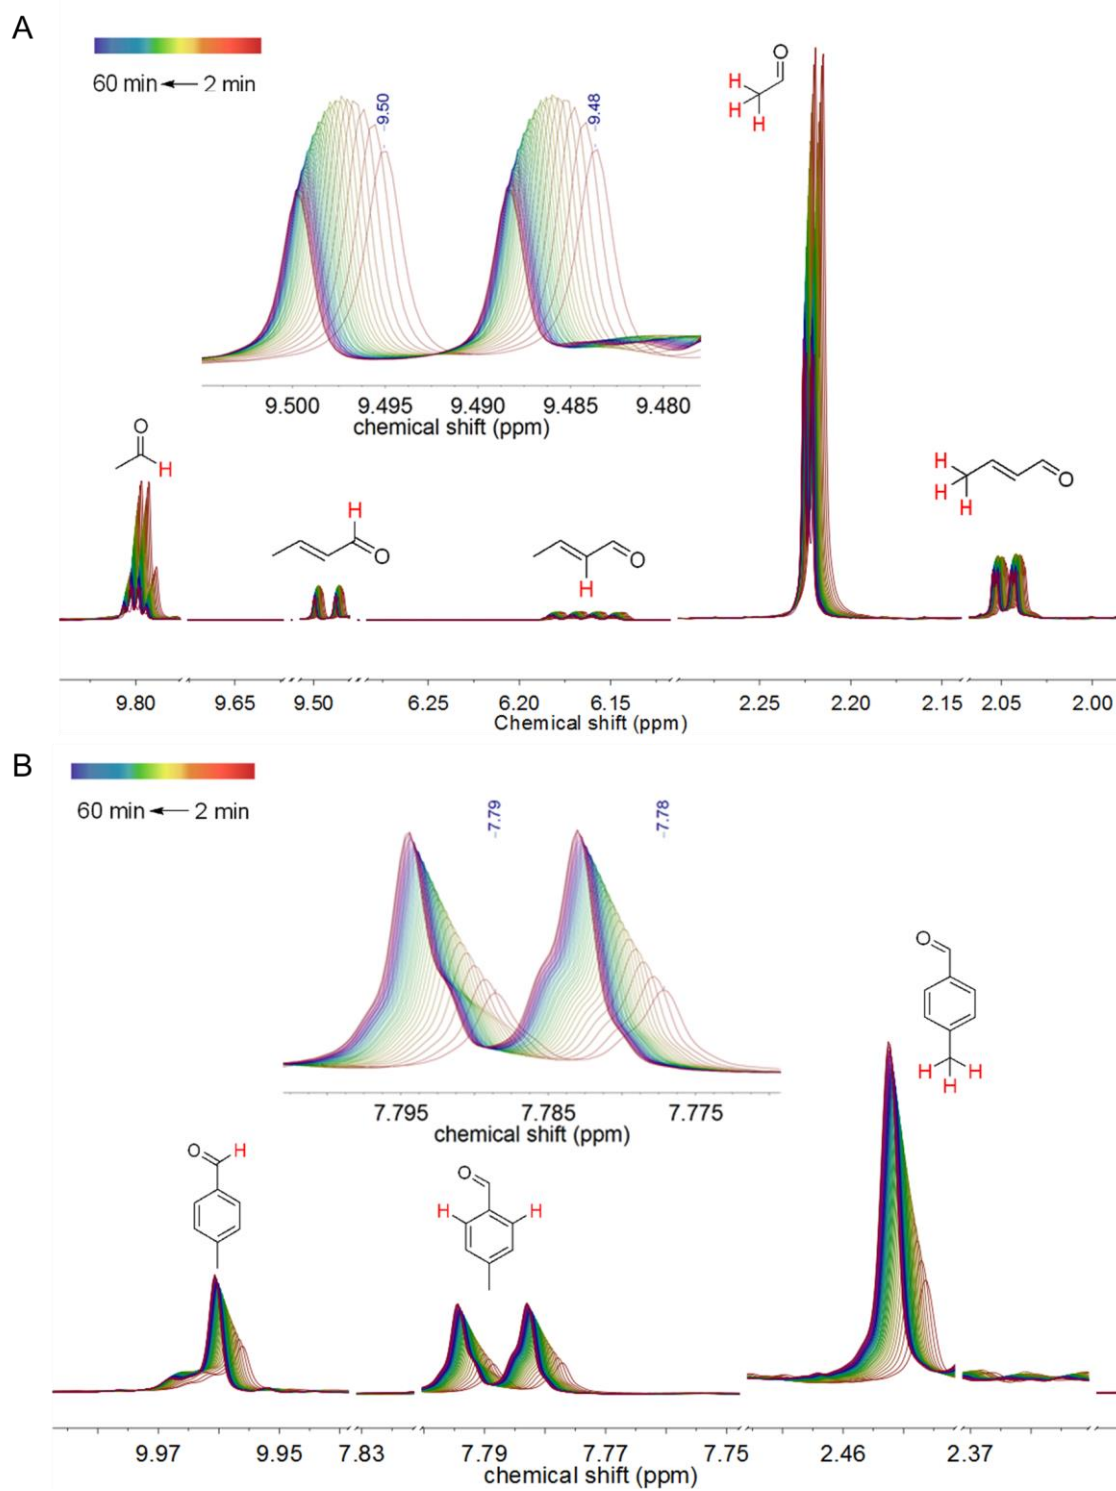

**Figure S6.** Effect of water amounts on product distributions with THP-DPh-OTMS, related to the STAR Methods (conditions: the amounts of water were varied in the range of 0~4 mmol).

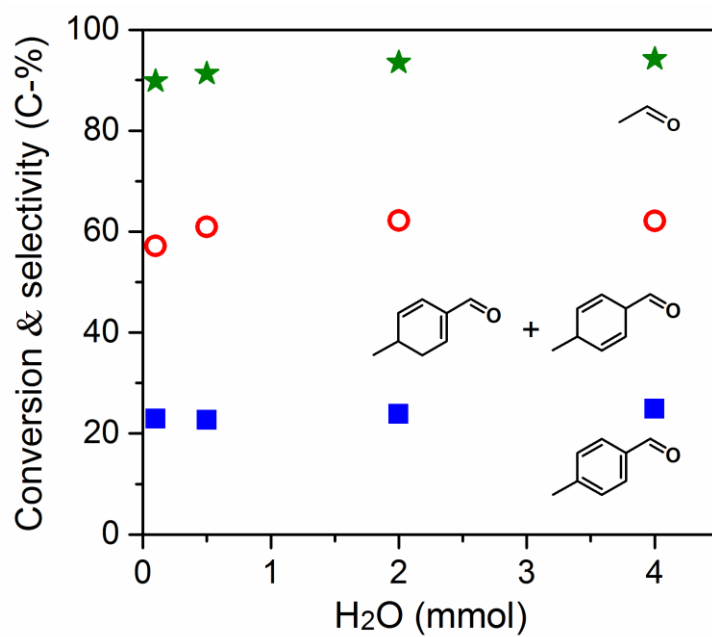

**Figure S7.** Detected fragment ions of  $^{16}\text{O}$ - and  $^{18}\text{O}$ -incorporated aldehydes marked in blue and red, respectively, related to the Scheme 2.

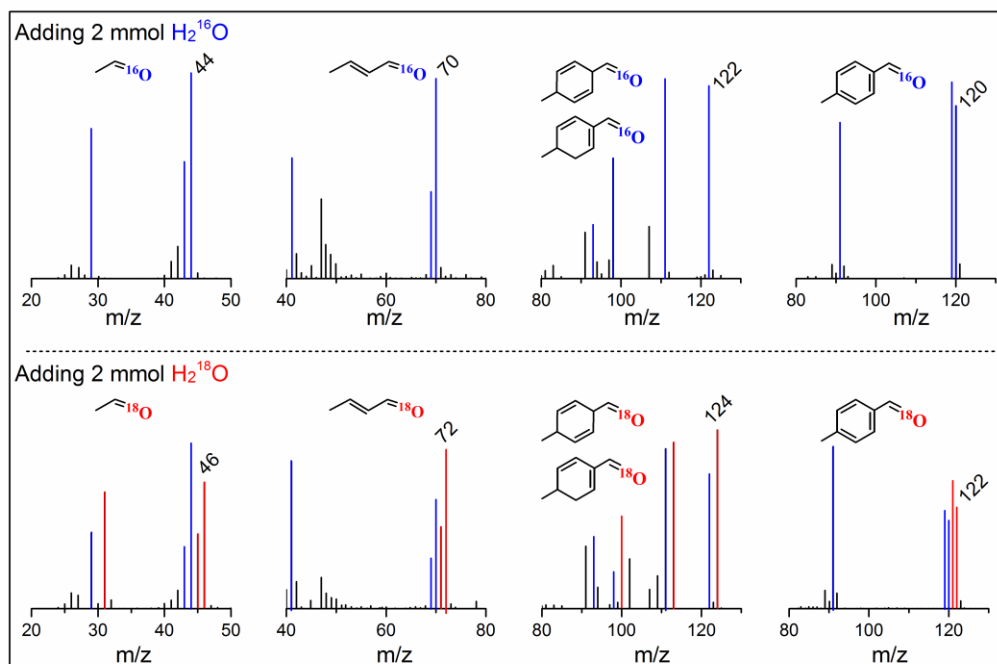



**Figure S8.** Aldehyde condensation (and aromatization) catalyzed by THP-DPh-OTMS, related to Scheme 3.

(A) *n*-butyraldehyde.

(B) *trans*-2-butenal.

(C) 2-methyl-*trans*-2-butenal.

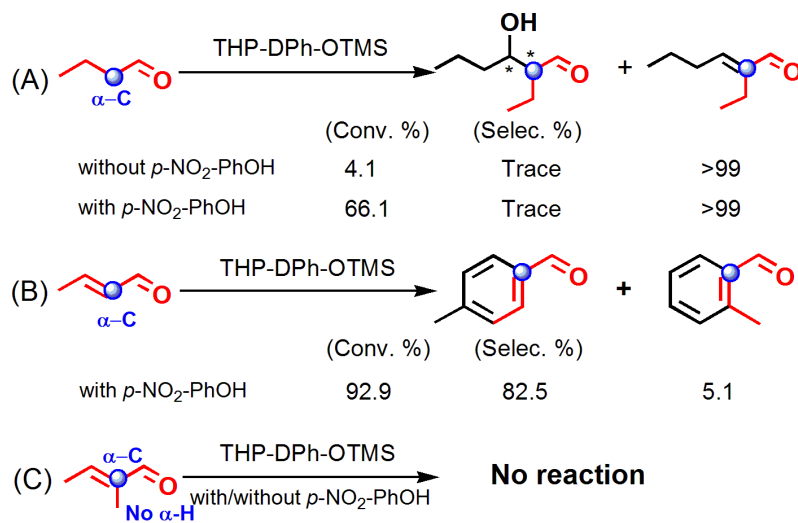

**Figure S9.** D-substituted experiments using CD<sub>3</sub>CDO (chemical purity, Aladdin) as reactant, related to STAR Methods.

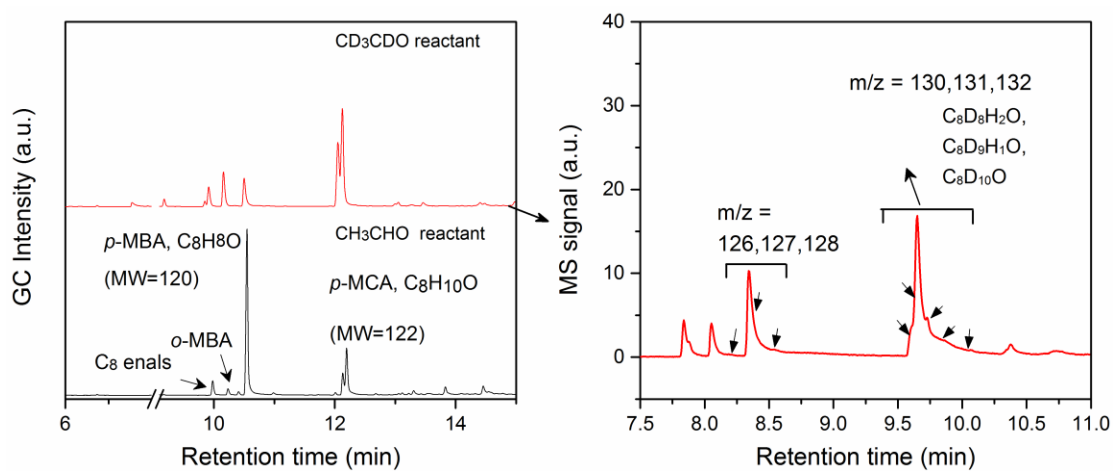

**Figure S10.** Mechanistic investigation, related to Scheme 5.

Reaction conditions: 1 mmol CH<sub>3</sub>CHO, 3 mL CHCl<sub>3</sub>, 0.1 mmol THP-DPh-OTMS, 0.3 mmol *p*-NO<sub>2</sub>-PhOH, 20 °C for 1.5 h, Ar atmosphere. In the controlled experiment, 3 mmol (3 equiv) 2,2,6,6-tetramethyl-1-piperidinyloxy (TEMPO) was added prior to the reaction.

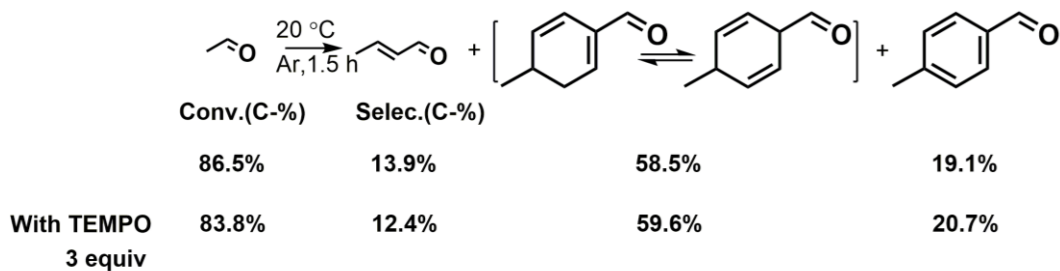

**Figure S11.** Scale-up experiments, related to STAR Methods.

(A) Product distributions.

(B) GC profile.

The insert panel in (B) is an optical photograph of the collected product (including 206.5 mg *p*-MBA calculated on basis of the molar percent).  $\text{CHCl}_3$  shown in (B) was used as solvent to dilute the collected product for injecting into the GC inlet.

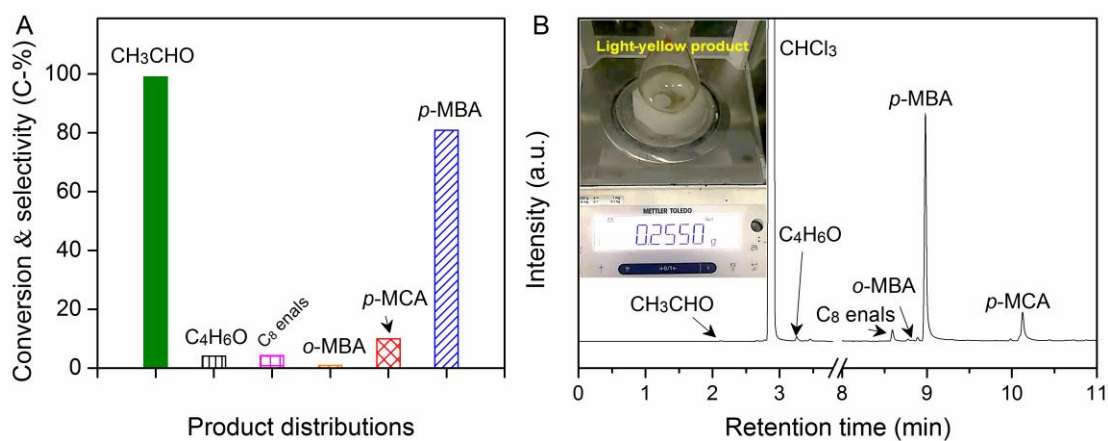

**Table S1.** Product distributions of acetaldehyde condensation and aromatization,<sup>[a]</sup> related to Figure 1.

| Entry            | Catalysts    | Organic acid                      | Solvents                         | Conversion (C-%) | Selectivity (C-%) |               |               |                      |                      |                      |        |
|------------------|--------------|-----------------------------------|----------------------------------|------------------|-------------------|---------------|---------------|----------------------|----------------------|----------------------|--------|
|                  |              |                                   |                                  |                  | <i>p</i> -MBA     | <i>p</i> -MCA | <i>o</i> -MBA | C <sub>8</sub> enals | C <sub>6</sub> enals | C <sub>4</sub> enals | Others |
| 1                | THP          | <i>p</i> -NO <sub>2</sub> -PhOH   | CHCl <sub>3</sub>                | >99              | 26.5              | 24.3          | 2.9           | 43.8                 | Trace                | Trace                | 2.5    |
| 2                | THP-OH       | <i>p</i> -NO <sub>2</sub> -PhOH   | CHCl <sub>3</sub>                | >99              | 19.8              | 36.6          | 7.8           | 35.5                 | 0.1                  | 0.2                  | -      |
| 3                | THP-COOH     | <i>p</i> -NO <sub>2</sub> -PhOH   | CHCl <sub>3</sub>                | >99              | 0.7               | 7.6           | 5.7           | 2.8                  | Trace                | 83.0                 | 0.2    |
| 4                | THP-Ph       | <i>p</i> -NO <sub>2</sub> -PhOH   | CHCl <sub>3</sub>                | >99              | 13.3              | 49.3          | 8.7           | 28.7                 | Trace                | Trace                | -      |
| 5                | THP-DPh-OTMS | <i>p</i> -NO <sub>2</sub> -PhOH   | CHCl <sub>3</sub>                | 88.6             | 25.3              | 57.2          | 5.3           | 2.6                  | 1.4                  | 8.1                  | -      |
| 6 <sup>[b]</sup> | THP-DPh-OTMS | <i>p</i> -NO <sub>2</sub> -PhOH   | CHCl <sub>3</sub>                | 99.8             | 90.0              | 4.9           | 2.4           | 2.4                  | Trace                | 0.3                  | -      |
| 7                | THP-DPh-OTMS | <i>p</i> -NO <sub>2</sub> -PhCOOH | CHCl <sub>3</sub>                | 50.5             | 2.6               | 1.8           | 1.0           | 0.6                  | 7.6                  | 86.4                 | -      |
| 8                | THP-DPh-OTMS | PhOH                              | CHCl <sub>3</sub>                | 86.9             | 4.9               | 28.8          | 1.1           | 4.8                  | 3.1                  | 57.4                 | -      |
| 9                | THP-DPh-OTMS | <i>p</i> -CH <sub>3</sub> -PhOH   | CHCl <sub>3</sub>                | 77.4             | 8.5               | 14.7          | 0.4           | 2.7                  | 1.7                  | 72.0                 | -      |
| 10               | THP-DPh-OTMS | <i>p</i> -COOH-PhOH               | CHCl <sub>3</sub>                | 82.3             | 3.2               | 30.1          | 2.9           | 4.1                  | 6.3                  | 53.5                 | -      |
| 11               | THP-DPh-OTMS | <i>p</i> -NO <sub>2</sub> -PhOH   | CH <sub>3</sub> CN               | 66.3             | 8.1               | 13.4          | 8.0           | 8.8                  | 0.9                  | 61.1                 | -      |
| 12               | THP-DPh-OTMS | <i>p</i> -NO <sub>2</sub> -PhOH   | C <sub>2</sub> H <sub>5</sub> OH | 27.6             | 14.1              | 16.7          | 7.7           | 26.8                 | 1.5                  | 33.1                 | -      |
| 13               | THP-DPh-OTMS | <i>p</i> -NO <sub>2</sub> -PhOH   | DMF                              | 3.6              | Trace             | Trace         | Trace         | 42.9                 | 30.4                 | 26.8                 | -      |
| 14               | THP-DPh-OTMS | <i>p</i> -NO <sub>2</sub> -PhOH   | DMSO                             | Trace            | -                 | -             | -             | -                    | -                    | -                    | -      |

[a] Reaction conditions: acetaldehyde (1 mmol), solvent (3 mL), catalyst (0.1 mmol), organic acid (0.3 mmol). The reaction mixture was stirred at 20 °C for 2 h under Ar atmosphere in a vial.

[b] Reaction mixture was added 0.1 mmol THP-DPh-OTMS and stirred for another 2 h at 60 °C.

**Table S2.** Products selectivity under Ar and Air atmosphere,<sup>[a]</sup> related to STAR Methods.

| Reaction atmosphere | Air              |                   |               | Ar               |                   |               | Ar <sup>[b]</sup> |                   |               |
|---------------------|------------------|-------------------|---------------|------------------|-------------------|---------------|-------------------|-------------------|---------------|
|                     | Conversion (C-%) | Selectivity (C-%) |               | Conversion (C-%) | Selectivity (C-%) |               | Conversion (C-%)  | Selectivity (C-%) |               |
|                     |                  | <i>p</i> -MBA     | <i>p</i> -MCA |                  | <i>p</i> -MBA     | <i>p</i> -MCA |                   | <i>p</i> -MBA     | <i>p</i> -MCA |
| 1                   | 89.6             | 21.2              | 55.3          | 85.1             | 20.2              | 54.0          | -                 | -                 | -             |
| 2                   | 86.5             | 22.8              | 56.3          | 88.6             | 25.3              | 57.2          | 93.0              | 24.0              | 58.7          |
| 4                   | 91.1             | 24.7              | 56.3          | 90.0             | 26.0              | 58.0          | -                 | -                 | -             |
| 10                  | 93.8             | 32.0              | 57.4          | 91.0             | 31.8              | 57.2          | -                 | -                 | -             |
| 20                  | 93.5             | 35.9              | 55.1          | 97.5             | 34.9              | 58.7          | -                 | -                 | -             |
| 30                  | 94.4             | 39.0              | 53.1          | 93.5             | 38.9              | 55.1          | -                 | -                 | -             |
| 40                  | 95.4             | 42.5              | 51.5          | 97.5             | 41.5              | 54.5          | -                 | -                 | -             |
| 52                  | 98.2             | 45.2              | 47.4          | 98.3             | 47.4              | 45.6          | -                 | -                 | -             |
| 60                  | 98.5             | 49.5              | 45.4          | -                | -                 | -             | -                 | -                 | -             |
| 72                  | 99.1             | 51.8              | 41.9          | 98.7             | 49.9              | 41.9          | -                 | -                 | -             |
| 80                  | 99.5             | 57.8              | 35.6          | 99.3             | 55.7              | 39.3          | -                 | -                 | -             |

[a] Reaction conditions: CH<sub>3</sub>CHO (1 mmol), CHCl<sub>3</sub> (3 mL), THP-DPh-OTMS (0.1 mmol), *p*-NO<sub>2</sub>-PhOH (0.3 mmol). The reaction mixture was stirred under air or Ar atmosphere at 20 °C. [b] Using further degassed CHCl<sub>3</sub> (see Methods Details).

**Table S3.** Dependence of products selectivity on the type and amounts of samines, <sup>[a]</sup> related to STAR Methods.

| Entry | Adding Amines                                                   | Amount (mmol) | T (°C) | t (h) | Conversion (C-%)    | Selectivity (C-%) |               | Carbon balance (C-%) |
|-------|-----------------------------------------------------------------|---------------|--------|-------|---------------------|-------------------|---------------|----------------------|
|       |                                                                 |               |        |       |                     | <i>p</i> -MBA     | <i>p</i> -MCA |                      |
| 1     | -                                                               | -             | 20     | 1     | 87.4                | 21.7              | 60.1          | ~99                  |
| 2     | -                                                               | -             | 40     | 1     | 84.1                | 22.6              | 55.9          | -                    |
| 3     | -                                                               | -             | 60     | 2     | 83.4                | 34.8              | 45.0          | 97                   |
| 4     | -                                                               | -             | 60     | 5     | 88.1                | 37.6              | 43.8          | -                    |
| 5     | -                                                               | -             | 60     | 15    | 98.4                | 47.7              | 41.6          | -                    |
| 6     | -                                                               | -             | 60     | 20    | 95.3                | 52.4              | 35.5          | 88.8                 |
| 7     | THP-BPh-OTMS                                                    | 0.1           | 60     | 2     | 99.8                | 90.0              | 4.9           | 88.0                 |
| 8     | NH(C <sub>2</sub> H <sub>5</sub> )                              | 0.3           | 20     | 1     | 99.8                | 28.0              | 56.4          | -                    |
| 9     | NH(C <sub>2</sub> H <sub>5</sub> )                              | 0.3           | 40     | 1     | 99.8                | 31.5              | 49.2          | -                    |
| 10    | NH(C <sub>2</sub> H <sub>5</sub> )                              | 0.3           | 60     | 1     | 99.9                | 59.3              | 26.4          | 90                   |
| 11    | NH(C <sub>2</sub> H <sub>5</sub> )                              | 0.15          | 60     | 1     | 99.8                | 51.1              | 30.7          | -                    |
| 12    | NH(C <sub>2</sub> H <sub>5</sub> )                              | 0.45          | 60     | 1     | 99.8                | 67.5              | 17.9          | -                    |
| 13    | NH(C <sub>2</sub> H <sub>5</sub> )                              | 0.15          | 60     | 2     | 99.8                | 80.6              | 11.4          | 85.0                 |
| 14    | N(C <sub>3</sub> H <sub>7</sub> )                               | 0.3           | 60     | 1     | 92.5                | 40.3              | 48.8          | 97.5                 |
| 15    | (NH <sub>2</sub> ) <sub>2</sub> (CH <sub>2</sub> ) <sub>6</sub> | 0.05          | 60     | 1     | 91.1                | 47.1              | 37.7          | 60.3                 |
| 16    | -                                                               | -             | 60     | 3     | 91.7 <sup>[b]</sup> | 62.1              | 28.8          | 58.7                 |

[a] Reaction conditions: CH<sub>3</sub>CHO (1 mmol), CHCl<sub>3</sub> (3 mL), THP-DPh-OTMS (0.1 mmol), *p*-NO<sub>2</sub>-PhOH (0.3 mmol), Ar atmosphere. After reaction for 2 h, organic amines were added and then the mixture was stirred for more time at a certain temperature.

[b] Reaction was directly conducted at 60 °C for 3 h using acetaldehyde as reactant.
